# Supplementary material
Source: Springer Nature journal article supplement (https://www.springermedizin.de/resource/supplementary/12913_2013_3150_MOESM6_ESM.pdf/9532502)
Supplement: MOESM6 [file 9532502]

**Table 3: Multivariate analysis**

| <b>Variable</b>               | <b>OR</b> | <b>P value</b> | <b>95% CI</b> |
|-------------------------------|-----------|----------------|---------------|
| <b>Age of Head</b>            | 0.99      | 0.050          | 0.98 - 1.00   |
| <b>Education of head</b>      |           |                |               |
| Primary or below              | 1.00      | REF            |               |
| Secondary or above            | 0.49      | <0.0001        | 0.40 - 0.60   |
| <b>Employment of head</b>     |           |                |               |
| Formally employed             | 0.58      | 0.001          | 0.42 - 0.81   |
| Self employed                 | 1.10      | 0.520          | 0.82 - 1.47   |
| Unemployed                    |           |                |               |
| <b>Household size</b>         | 1.03      | 0.185          | 0.98 - 1.08   |
| <b>People per room</b>        | 1.16      | 0.001          | 1.06 - 1.26   |
| <b>Acres of land owned</b>    | 1.01      | 0.531          | 0.99 - 1.03   |
| <b>Distance in kilometers</b> |           |                |               |
| To Road (kms)                 | 1.14      | 0.403          | 0.84 - 1.56   |
| <b>Distance categories</b>    |           |                |               |
|                               | 1.00      | REF            |               |
| <4km from District Hospital   |           |                |               |
|                               | 2.07      | <0.0001        | 1.66 - 2.57   |
| >4km from District hospital   |           |                |               |
